# Supplementary material for: Promoting Functional Health in Midlife and Old Age: Long-Term Protective Effects of Control Beliefs, Social Support, and Physical Exercise
Source: PubMed Central journal article supplement (PMC2952603; doi:10.1371/journal.pone.0013297), 2010-10-11
Supplement: pone.0013297.s001.pdf [file pone.0013297.s001.pdf]

**Table S1. Comparison of the Longitudinal Participants and the Dropouts**

| <b>Variable (Time 1)</b>                 | <b>Longitudinal<br/>(N = 4,955)</b> | <b>Dropouts<br/>(N = 2,145)</b> | <b>p value</b> |
|------------------------------------------|-------------------------------------|---------------------------------|----------------|
| Age, Mean (SD) in years                  | 46.48 (12.50)                       | 46.21 (14.10)                   | .457           |
| Women, %                                 | 53.3                                | 47.8                            | < .001         |
| Education, Mean (SD) in years            | 14.02 (2.60)                        | 13.13 (2.60)                    | < .001         |
| Non Hispanic white, %                    | 93.0                                | 84.0                            | < .001         |
| Health Status                            | .26 (.53)                           | .33 (.64)                       | < .001         |
| Waist Circumference, Mean (SD) in inches | 35.33 (5.75)                        | 35.63 (5.79)                    | .079           |
| Do Smoke, %                              | 19.6                                | 30.6                            | < .001         |
| Do Have Alcohol or Drug Problems, %      | 2.2                                 | 3.6                             | .002           |
| Control Beliefs, Mean (SD)               | 5.54 (1.00)                         | 5.38 (1.09)                     | < .001         |
| Quality of Social Support, Mean (SD)     | 3.18 (.37)                          | 3.13 (.43)                      | < .001         |
| Physical Exercise, Mean (SD)             | 4.20 (1.69)                         | 3.96 (1.81)                     | < .001         |
| Functional Health, Mean (SD)             | 88.73 (19.98)                       | 81.38 (26.93)                   | < .001         |

p values for means are derived from independent samples t-tests

p values for percentages are derived from  $\chi^2$  tests
