# Supplementary material for: Promoting Functional Health in Midlife and Old Age: Long-Term Protective Effects of Control Beliefs, Social Support, and Physical Exercise
Source: PubMed Central journal article supplement (PMC2952603; doi:10.1371/journal.pone.0013297), 2010-10-11
Supplement: pone.0013297.s002.pdf [file pone.0013297.s002.pdf]

**Table S2. Hierarchical Multiple Regression with Functional Health at Time 2 as Dependent Variable and with Socio-demographics and Time 1 Variables: Functional Health, Health Status, Physical Risk Factors, and Protective Composite (computed with continuous z-scores) as Predictors**

| Predictors                                                                                                    | Unstandardized<br>(Standardized)<br>Parameter<br>Estimate | SE<br>(Robust<br>SE <sup>†</sup> ) | p value<br>(p value with<br>Robust SE <sup>†</sup> ) |
|---------------------------------------------------------------------------------------------------------------|-----------------------------------------------------------|------------------------------------|------------------------------------------------------|
| <b>STEP 1 : R<sup>2</sup> = .411</b>                                                                          |                                                           |                                    |                                                      |
| <b>F(6, 3619) = 420.91, p &lt; .001; Clustered F<sup>†</sup> (6, 2760) = 323.01, p &lt; .001</b>              |                                                           |                                    |                                                      |
| Functional Health                                                                                             | .67 (.50)                                                 | .018 (.024)                        | < .001 (< .001)                                      |
| Age*                                                                                                          | -.38 (-.19)                                               | .027 (.028)                        | < .001 (< .001)                                      |
| Sex                                                                                                           | -1.08 (-.04)                                              | .330 (.327)                        | .001 (.001)                                          |
| Education                                                                                                     | 1.09 (.11)                                                | .128 (.131)                        | < .001 (< .001)                                      |
| Race                                                                                                          | .23 (.00)                                                 | .679 (.760)                        | .731 (.759)                                          |
| Health Status                                                                                                 | -5.10 (-.11)                                              | .641 (.807)                        | < .001 (< .001)                                      |
| <b>STEP 2 : R<sup>2</sup> change = .024</b>                                                                   |                                                           |                                    |                                                      |
| <b>F Change (3, 3616) = 51.22, p &lt; .001; Clustered F change<sup>†</sup> (3, 2760) = 37.91, p &lt; .001</b> |                                                           |                                    |                                                      |
| Functional Health                                                                                             | .61 (.45)                                                 | .019 (.025)                        | < .001 (< .001)                                      |
| Age*                                                                                                          | -.37 (-.18)                                               | .027 (.028)                        | < .001 (< .001)                                      |
| Sex                                                                                                           | -1.33 (-.05)                                              | .324 (.325)                        | < .001 (< .001)                                      |
| Education                                                                                                     | .81 (.08)                                                 | .129 (.129)                        | < .001 (< .001)                                      |
| Race                                                                                                          | .24 (.01)                                                 | .665 (.748)                        | .719 (.749)                                          |
| Health Status                                                                                                 | -4.93 (-.10)                                              | .628 (.779)                        | < .001 (< .001)                                      |
| Waist Circumference                                                                                           | -3.67 (-.15)                                              | .338 (.388)                        | < .001 (< .001)                                      |
| Smoking                                                                                                       | -2.61 (-.08)                                              | .426 (.469)                        | < .001 (< .001)                                      |
| Alcohol or Drug Problems                                                                                      | -2.51 (-.03)                                              | 1.099 (1.442)                      | .022 (.082)                                          |
| <b>STEP 3 : R<sup>2</sup> change = .006,</b>                                                                  |                                                           |                                    |                                                      |
| <b>F Change (1, 3615) = 38.55, p &lt; .001; Clustered F change<sup>†</sup> (1, 2760) = 31.47, p &lt; .001</b> |                                                           |                                    |                                                      |
| Functional Health                                                                                             | .58 (.43)                                                 | .019 (.026)                        | < .001 (< .001)                                      |
| Age*                                                                                                          | -.38 (-.18)                                               | .027 (.028)                        | < .001 (< .001)                                      |
| Sex                                                                                                           | -1.12 (-.04)                                              | .324 (.326)                        | .001 (.001)                                          |
| Education                                                                                                     | .74 (.08)                                                 | .128 (.129)                        | < .001 (< .001)                                      |
| Race                                                                                                          | .42 (.01)                                                 | .662 (.735)                        | .529 (.571)                                          |
| Health Status                                                                                                 | -4.79 (-.10)                                              | .626 (.772)                        | < .001 (< .001)                                      |
| Waist Circumference                                                                                           | -3.44 (-.14)                                              | .338 (.387)                        | < .001 (< .001)                                      |
| Smoking                                                                                                       | -2.55 (-.08)                                              | .424 (.466)                        | < .001 (< .001)                                      |
| Alcohol or Drug Problems                                                                                      | -2.04 (-.02)                                              | 1.096 (1.431)                      | .063 (.154)                                          |
| Protective Composite*                                                                                         | 1.03 (.08)                                                | .165 (.183)                        | < .001 (< .001)                                      |

**Table S2 (continued)**

| <b>STEP 4 : R<sup>2</sup> change = .001</b>                                                          |              |               |                 |
|------------------------------------------------------------------------------------------------------|--------------|---------------|-----------------|
| <b>F Change (1, 3614) = 5.00, p = .025; Clustered F change<sup>†</sup> (1, 2760) = 3.88, p =.049</b> |              |               |                 |
| Functional Health                                                                                    | .57 (.43)    | .019 (.026)   | < .001 (< .001) |
| Age*                                                                                                 | -.38 (-.19)  | .027 (.028)   | < .001 (< .001) |
| Sex                                                                                                  | -1.09 (-.04) | .324 (.327)   | .001 (.001)     |
| Education                                                                                            | .74 (.08)    | .128 (.129)   | < .001 (< .001) |
| Race                                                                                                 | .38 (.01)    | .662 (.733)   | .564 (.602)     |
| Health Status                                                                                        | -4.78 (-.10) | .625 (.772)   | < .001 (< .001) |
| Waist Circumference                                                                                  | -3.48 (-.14) | .339 (.388)   | < .001 (< .001) |
| Smoking                                                                                              | -2.58 (-.08) | .424 (.466)   | < .001 (< .001) |
| Alcohol or Drug Problems                                                                             | -2.14 (-.03) | 1.096 (1.425) | .051 (.133)     |
| Protective Composite*                                                                                | 1.02 (.08)   | .165 (.182)   | < .001 (< .001) |
| Protective Composite* x Age*                                                                         | .03 (.03)    | .013 (.015)   | .025 (.049)     |

\*Age and the protective composite score were centered to the mean

<sup>†</sup> Values obtained using cluster option at the family level in STATA
