# Supplementary material for: Promoting Functional Health in Midlife and Old Age: Long-Term Protective Effects of Control Beliefs, Social Support, and Physical Exercise
Source: PubMed Central journal article supplement (PMC2952603; doi:10.1371/journal.pone.0013297), 2010-10-11
Supplement: pone.0013297.s004.pdf [file pone.0013297.s004.pdf]

**Table S4. Hierarchical Multiple Regression with Functional Health at Time 2 as Dependent Variable and with Socio-demographics and Time 1 Variables: Functional Health, Health Status, Physical Risk Factors, and all Combinations of Protective Factors as Predictors**

| Predictors                                                                                         | Unstandardized<br>(Standardized)<br>Parameter<br>Estimate           | SE<br>(Robust<br>SE*)          | p value<br>(p value with<br>Robust SE*) |                                                                           |                                                          |             |
|----------------------------------------------------------------------------------------------------|---------------------------------------------------------------------|--------------------------------|-----------------------------------------|---------------------------------------------------------------------------|----------------------------------------------------------|-------------|
| <b>Step 1</b>                                                                                      |                                                                     |                                |                                         |                                                                           |                                                          |             |
| <b>R<sup>2</sup> = .411</b>                                                                        |                                                                     |                                |                                         |                                                                           |                                                          |             |
| <b>F(6, 3619) = 420.91, p &lt; .001; Clustered F* (6, 2760) = 323.01, p &lt; .001</b>              |                                                                     |                                |                                         |                                                                           |                                                          |             |
| Functional Health                                                                                  | .67 (.50)                                                           | .018 (.024)                    | < .001 (< .001)                         |                                                                           |                                                          |             |
| Age                                                                                                | -.38 (-.19)                                                         | .027 (.028)                    | < .001 (< .001)                         |                                                                           |                                                          |             |
| Sex                                                                                                | -1.08 (-.04)                                                        | .330 (.327)                    | .001 (.001)                             |                                                                           |                                                          |             |
| Education                                                                                          | 1.09 (.11)                                                          | .128 (.131)                    | < .001 (< .001)                         |                                                                           |                                                          |             |
| Race                                                                                               | .23 (.00)                                                           | .679 (.760)                    | .731 (.759)                             |                                                                           |                                                          |             |
| Health Status                                                                                      | -5.10 (-.11)                                                        | .641 (.807)                    | < .001 (< .001)                         |                                                                           |                                                          |             |
| <b>Step 2</b>                                                                                      |                                                                     |                                |                                         |                                                                           |                                                          |             |
| <b>R<sup>2</sup> change = .024</b>                                                                 |                                                                     |                                |                                         |                                                                           |                                                          |             |
| <b>F change (3, 3616) = 51.22, p &lt; .001; Clustered F change* (3, 2760) = 37.91, p &lt; .001</b> |                                                                     |                                |                                         |                                                                           |                                                          |             |
| Functional Health                                                                                  | .61 (.45)                                                           | .019 (.025)                    | < .001 (< .001)                         |                                                                           |                                                          |             |
| Age                                                                                                | -.37 (-.18)                                                         | .027 (.028)                    | < .001 (< .001)                         |                                                                           |                                                          |             |
| Sex                                                                                                | -1.33 (-.05)                                                        | .324 (.325)                    | < .001 (< .001)                         |                                                                           |                                                          |             |
| Education                                                                                          | .81 (.08)                                                           | .129 (.129)                    | < .001 (< .001)                         |                                                                           |                                                          |             |
| Race                                                                                               | .24 (.01)                                                           | .665 (.748)                    | .719 (.749)                             |                                                                           |                                                          |             |
| Health Status                                                                                      | -4.93 (-.10)                                                        | .628 (.779)                    | < .001 (< .001)                         |                                                                           |                                                          |             |
| Waist Circumference                                                                                | -3.67 (-.15)                                                        | .338 (.388)                    | < .001 (< .001)                         |                                                                           |                                                          |             |
| Smoking                                                                                            | -2.61 (-.08)                                                        | .426 (.469)                    | < .001 (< .001)                         |                                                                           |                                                          |             |
| Alcohol or Drug Problems                                                                           | -2.51 (-.03)                                                        | 1.099 (1.442)                  | .022 (.082)                             |                                                                           |                                                          |             |
|                                                                                                    | <b>Unstandardized<br/>(Standardized)<br/>Parameter<br/>Estimate</b> | <b>SE<br/>(Robust<br/>SE*)</b> | <b>R<sup>2</sup><br/>change</b>         | <b>F change<br/>(1, 3615)<br/>(Clustered<br/>F change*<br/>(1, 2760))</b> | <b>p value<br/>(p value<br/>with<br/>Robust<br/>SE*)</b> |             |
| <b>Step 3.1a</b>                                                                                   | Control Beliefs                                                     | 2.14 (.04)                     | .646 (.660)                             | .002                                                                      | 10.94 (10.48)                                            | .001 (.001) |
| <b>Step 3.1b</b>                                                                                   | Social Support                                                      | 2.15 (.04)                     | .645 (.639)                             | .002                                                                      | 11.06 (11.27)                                            | .001 (.001) |
| <b>Step 3.1c</b>                                                                                   | Physical Exercise                                                   | 1.86 (.04)                     | .680 (.699)                             | .001                                                                      | 7.47 (7.07)                                              | .006 (.008) |

**Table S4 (continued)**

|                  |                                                                             | <b>Unstandardized<br/>(Standardized)<br/>Parameter<br/>Estimate</b> | <b>SE<br/>(Robust<br/>SE*)</b> | <b>R<sup>2</sup><br/>change</b> | <b>F change<br/>(1, 3615)<br/>(Clustered<br/>F change*<br/>(1, 2760))</b> | <b>p value<br/>(p value<br/>with<br/>Robust<br/>SE*)</b> |
|------------------|-----------------------------------------------------------------------------|---------------------------------------------------------------------|--------------------------------|---------------------------------|---------------------------------------------------------------------------|----------------------------------------------------------|
| <b>Step 3.2a</b> | (Control Beliefs & Social Support)                                          | 1.72 (.05)                                                          | .409 (.416)                    | .003                            | 17.72 (17.12)                                                             | < .001<br>(< .001)                                       |
| <b>Step 3.2b</b> | (Social Support & Physical Exercise)                                        | 1.97 (.06)                                                          | .463 (.461)                    | .003                            | 18.10 (18.20)                                                             | < .001<br>(< .001)                                       |
| <b>Step 3.2c</b> | (Control Beliefs & Physical Exercise)                                       | 1.87 (.06)                                                          | .452 (.462)                    | .003                            | 17.13 (16.40)                                                             | < .001<br>(< .001)                                       |
| <b>Step 3.3</b>  | Protective Composite (Control Beliefs & Social Support & Physical Exercise) | 1.67 (.06)                                                          | .341 (.346)                    | .004                            | 23.97 (23.33)                                                             | < .001<br>(< .001)                                       |

\* Values obtained using cluster option at the family level in STATA
