# Supplementary material for: Promoting Functional Health in Midlife and Old Age: Long-Term Protective Effects of Control Beliefs, Social Support, and Physical Exercise
Source: PLoS One. 2010 Oct 11;5(10):e13297. doi: 10.1371/journal.pone.0013297 (PMC2952603; doi:10.1371/journal.pone.0013297)
Supplement: Table S3 — Means, Standard Deviations, and Intercorrelations for all Variables. (0.03 MB PDF) [file pone.0013297.s003.pdf]

**Table S3. Means, Standard Deviations, and Intercorrelations for all Variables**

|                                                          | <i>M</i> | <i>SD</i> | 1     | 2     | 3     | 4     | 5     | 6     | 7                 |
|----------------------------------------------------------|----------|-----------|-------|-------|-------|-------|-------|-------|-------------------|
| 1. Age Time 1 (years)                                    | 47.27    | 12.39     |       |       |       |       |       |       |                   |
| 2. Sex (-1 = men, 1 = women)                             | -        | -         | -.02  |       |       |       |       |       |                   |
| 3. Education Time 1 (years)                              | 14.16    | 2.59      | -.09* | -.13* |       |       |       |       |                   |
| 4. Race (-1 = white, 1 = other)                          | -        | -         | -.05* | .05*  | -.01  |       |       |       |                   |
| 5. Health Status Time 1                                  | .25      | .53       | .24*  | .01   | -.03  | -.03  |       |       |                   |
| 6. Waist Circumference Time 1 (inches)                   | 35.36    | 5.74      | .19*  | -.42* | -.07* | .00   | .10*  |       |                   |
| 7. Smoking Time 1 (-1 = no, 1 = yes)                     | -        | -         | -.12* | .01   | -.21* | .00   | -.01  | -.06* |                   |
| 8. Alcohol or Drug Problems Time 1<br>(-1 = no, 1 = yes) | -        | -         | -.02  | -.05* | .00   | .01   | .05*  | .02   | .14*              |
| 9. Control Beliefs Time 1                                | 5.56     | .98       | -.06* | -.07* | .16*  | -.02  | -.09* | -.08* | -.02              |
| 10. Quality of Social Support Time 1                     | 3.18     | .37       | .15*  | .03   | .02   | -.06* | -.03  | -.08* | -.06*             |
| 11. Physical Exercise Time 1                             | 4.23     | 1.67      | -.21* | -.25* | .16*  | -.06* | -.10* | -.09* | -.07*             |
| 12. Protective Composite Time 1                          | 1.57     | .97       | -.05* | -.12* | .15*  | -.05* | -.09* | -.11* | -.07*             |
| 13. Control Beliefs Time 2                               | 5.55     | .99       | -.05* | -.08* | .15*  | -.03  | -.10* | -.06* | -.03              |
| 14. Quality of Social Support Time 2                     | 3.24     | .37       | .20*  | .01   | .03   | -.08* | -.02  | -.05* | -.06*             |
| 15. Physical Exercise Time 2                             | 3.74     | 1.85      | -.32* | -.12* | .16*  | -.06* | -.09* | -.07* | -.02              |
| 16. Protective Composite Time 2                          | 1.53     | .95       | -.07* | -.08* | .14*  | -.06* | -.09* | -.08* | -.04 <sup>†</sup> |
| 17. Functional Health Time 1                             | 89.58    | 18.59     | -.21* | -.13* | .18*  | -.07* | -.24* | -.23* | -.08*             |
| 18. Functional Health Time 2                             | 81.67    | 25.19     | -.33* | -.12* | .23*  | -.02  | -.28* | -.26* | -.10*             |

**Table S3 (continued)**

|                                                          | 8     | 9    | 10    | 11   | 12   | 13   | 14    | 15   | 16   | 17   |
|----------------------------------------------------------|-------|------|-------|------|------|------|-------|------|------|------|
| 1. Age Time 1 (years)                                    |       |      |       |      |      |      |       |      |      |      |
| 2. Sex (-1 = men, 1 = women)                             |       |      |       |      |      |      |       |      |      |      |
| 3. Education Time 1 (years)                              |       |      |       |      |      |      |       |      |      |      |
| 4. Race (-1 = white, 1 = other)                          |       |      |       |      |      |      |       |      |      |      |
| 5. Health Status Time 1                                  |       |      |       |      |      |      |       |      |      |      |
| 6. Waist Circumference Time 1 (inches)                   |       |      |       |      |      |      |       |      |      |      |
| 7. Smoking Time 1 (-1 = no, 1 = yes)                     |       |      |       |      |      |      |       |      |      |      |
| 8. Alcohol or Drug Problems Time 1<br>(-1 = no, 1 = yes) |       |      |       |      |      |      |       |      |      |      |
| 9. Control Beliefs Time 1                                | -.05* |      |       |      |      |      |       |      |      |      |
| 10. Quality of Social Support Time 1                     | -.10* | .38* |       |      |      |      |       |      |      |      |
| 11. Physical Exercise Time 1                             | .00   | .18* | .05*  |      |      |      |       |      |      |      |
| 12. Protective Composite Time 1                          | -.06* | .64* | .59*  | .53* |      |      |       |      |      |      |
| 13. Control Beliefs Time 2                               | -.05* | .60* | .30*  | .18* | .44* |      |       |      |      |      |
| 14. Quality of Social Support Time 2                     | -.11* | .32* | .61*  | .05* | .39* | .41* |       |      |      |      |
| 15. Physical Exercise Time 2                             | .01   | .11* | -.06* | .36* | .17* | .12* | -.08* |      |      |      |
| 16. Protective Composite Time 2                          | -.06* | .44* | .35*  | .26* | .47* | .65* | .54*  | .47* |      |      |
| 17. Functional Health Time 1                             | -.03  | .22* | .11*  | .33* | .26* | .24* | .09*  | .17* | .20* |      |
| 18. Functional Health Time 2                             | -.05* | .23* | .09*  | .29* | .24* | .30* | .09*  | .22* | .24* | .58* |

### Table S3 (continued)

\*Correlation is significant at the 0.01 level (2-tailed)

†Correlation is significant at the 0.05 level (2-tailed)

N = 3,578; *M* = Mean; *SD* = Standard Deviation

Age ranges from 24 to 75 years. Education level ranges from 6 to 20 years. For the health status, the number of chronic conditions ranges from 0 to 6. Waist circumference in inches ranges from 20 to 66 for women and 26.5 to 61 for men. Control beliefs range from 1.08 to 7 at both times. Quality of social support ranges from 1.44 to 4 at Time 1 and from 1.58 to 4 at Time 2. Physical exercise ranges from 1 to 6 at both times. Both protective composites range from 0 to 3. Both measures of functional health range from 0 to 100.
